# Supplementary material for: Assembly dynamics and the roles of FliI ATPase of the bacterial flagellar export apparatus
Source: PubMed Central journal article supplement — Sci Rep. 2014 Oct 6;4:6528. doi: 10.1038/srep06528 (PMC4185386; doi:10.1038/srep06528), 2014-10-06
Supplement: srep06528-s2.pdf [file srep06528-s2.pdf]

## **Supplementary Information**

### **Assembly dynamics and the roles of FliI ATPase of the bacterial flagellar export apparatus**

**Fan Bai, Yusuke V. Morimoto, Shinsuke D. J. Yoshimura, Noritaka Hara,  
Nobunori Kami-ike, Keiichi Namba & Tohru Minamino**

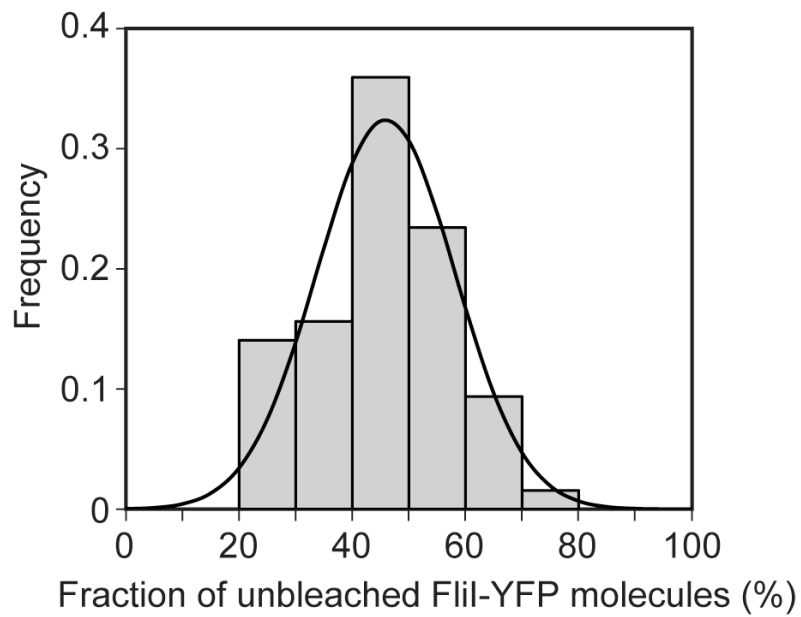

**Supplementary Fig. 1** Fraction of unbleached Flii-YFP molecules in the cytoplasm after one-shot photobleaching in TIRF-FRAP experiments. The fluorescence intensities of Flii-YFP in MKM30/pJSV203 under epi-fluorescence were compared before and after photobleaching by a strong excitation under TIRF. In total, 64 Flii-YFP spots were analyzed. The fraction distributions were fitted by Gaussian functions.

**Supplementary Movie S1.** Flii-YFP turnover at the flagellar base in a TIRF-FRAP experiment. Flii-YFP spots in *Salmonella* MKM30 strain harboring pJSV203 were observed under continuous TIRF illumination for 60 seconds after photobleaching. Arrowheads indicate the Flii-YFP spots showing a rapid turnover several times.
